# Supplementary material for: Endometriosis and the Urinary Tract: from Diagnosis to Surgical Treatment
Source: Preprints.org preprint supplement (doi:10.20944/preprints202009.0541.v1), 2020-09-23
Supplement: Supplementary file 1 [file supplementary]

Supplementary Figure


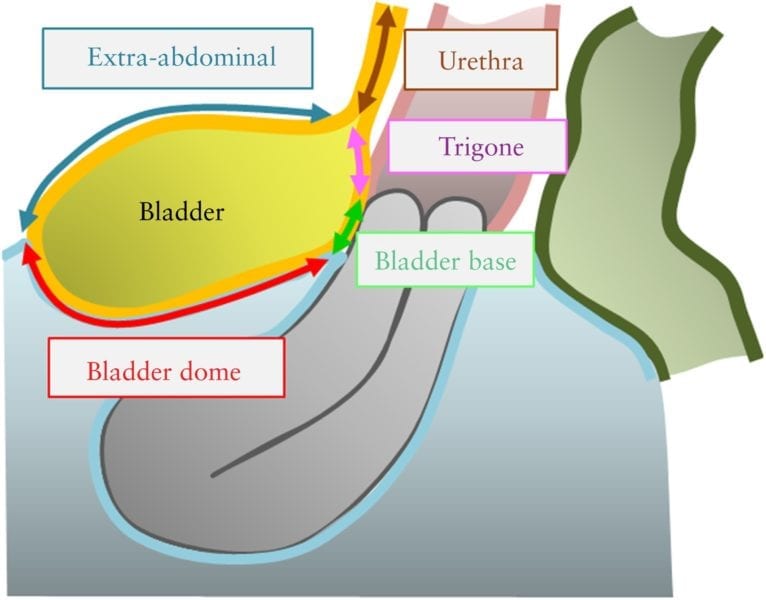


**Supplementary Figure 1:** Schematic drawing illustrating the four bladder zones: trigone, bladder base, bladder.dome and extra‐abdominal bladder. The demarcation point between the base and the dome of the bladder is the uterovesical pouch. Reprinted with permission from John Wiley and Sons.


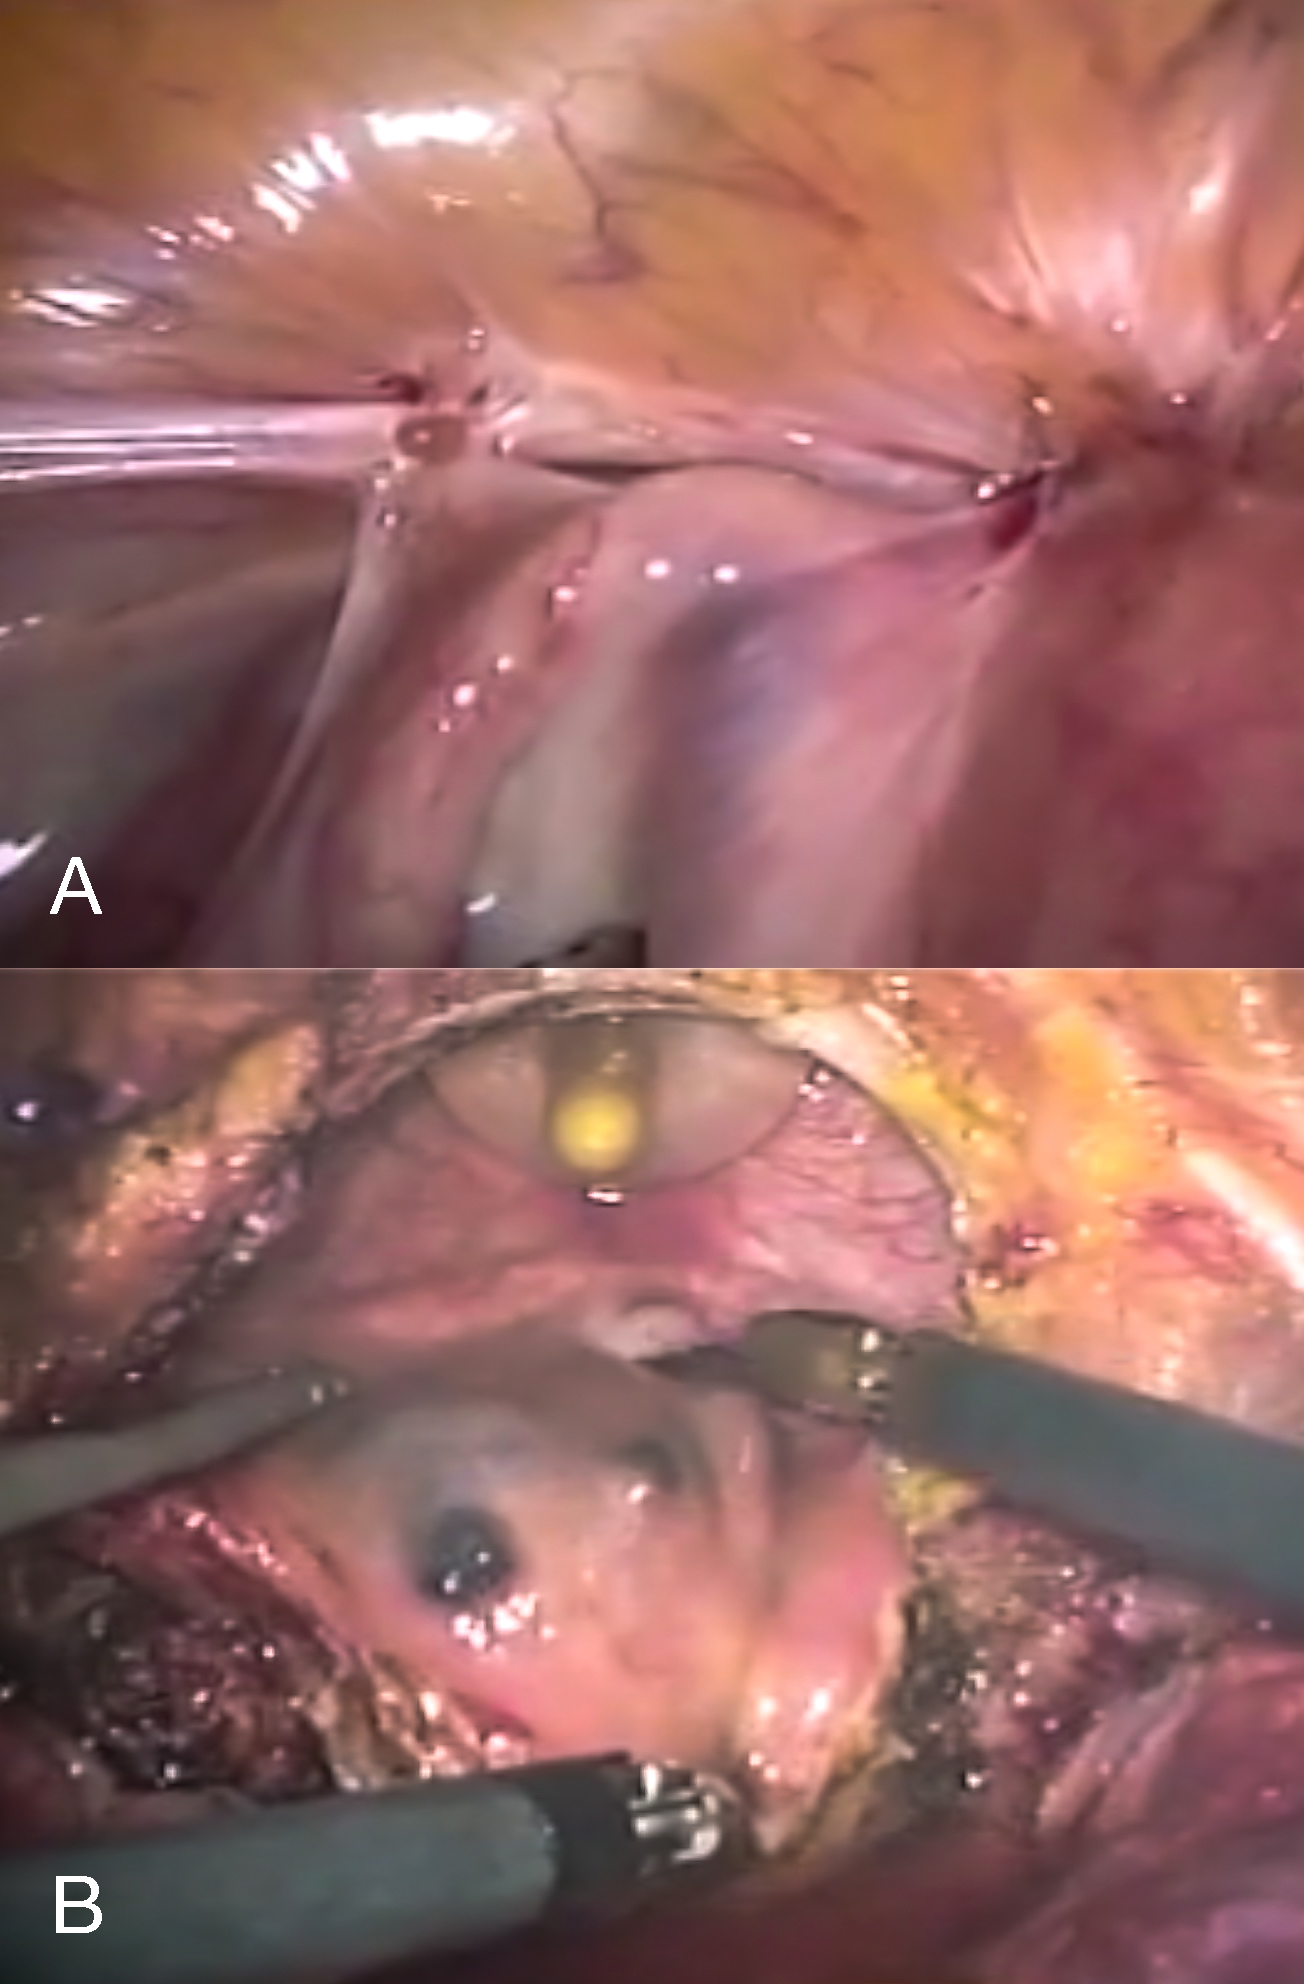


**Supplementary Figure 2:** Laparoscopic depiction of bladder deep endometriosis before (A) and during (B) full-thickness resection.

**
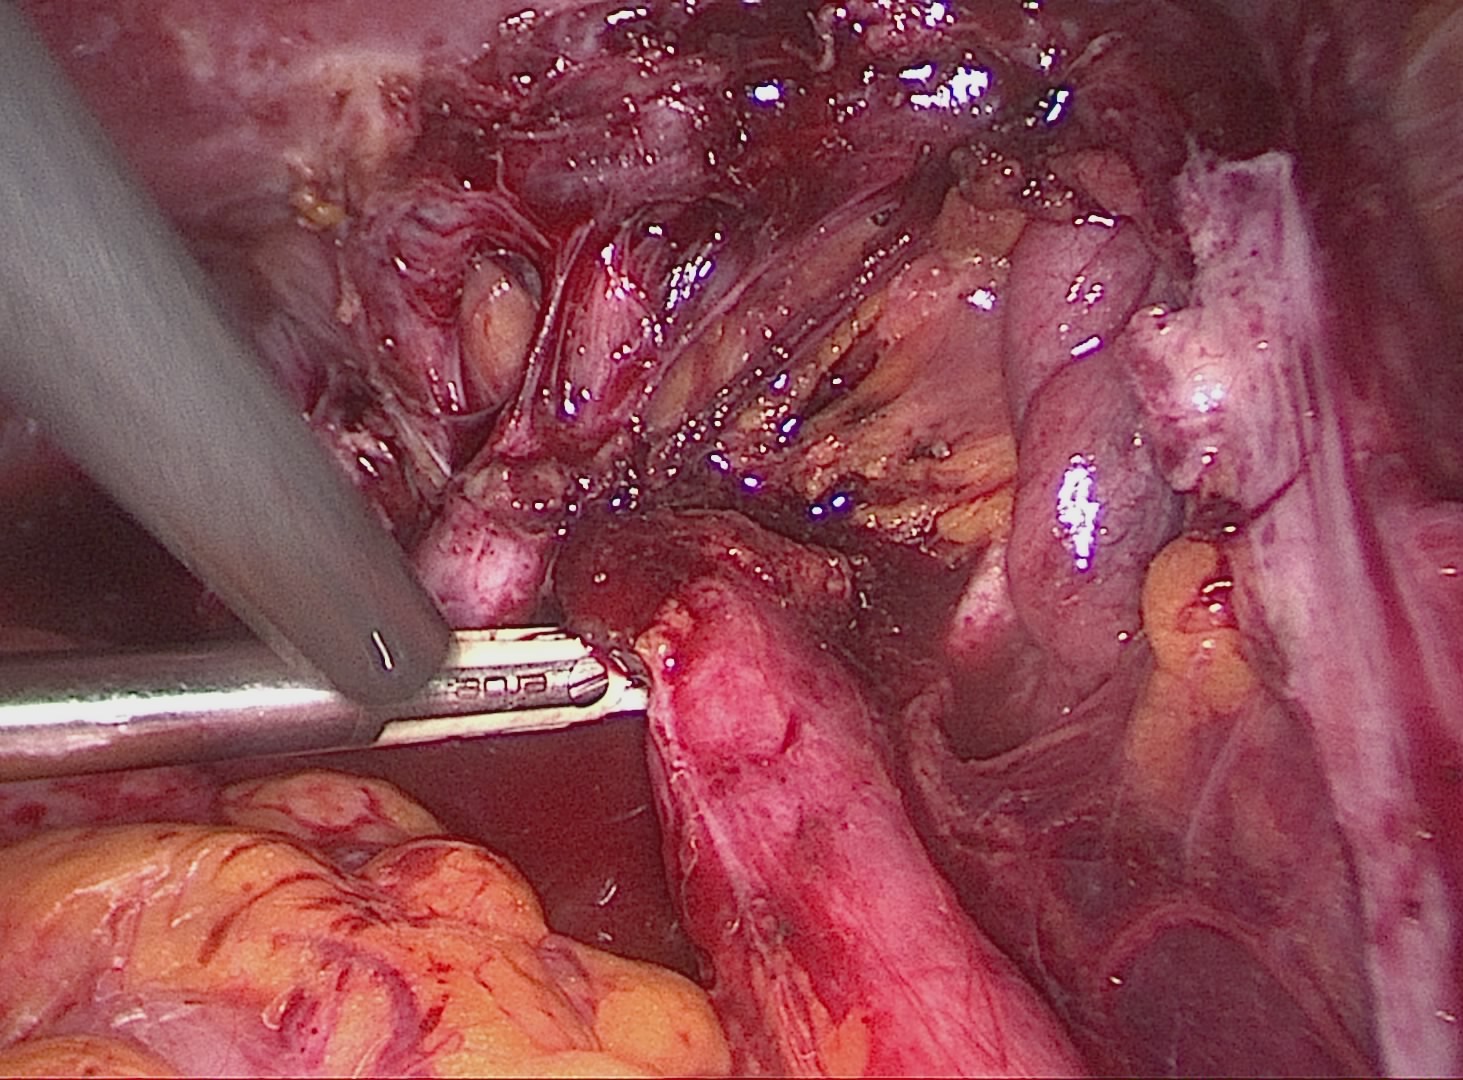
Supplementary Figure 3:** Laparoscopic depiction of right ureteral deep endometriosis leading to hydroureter.


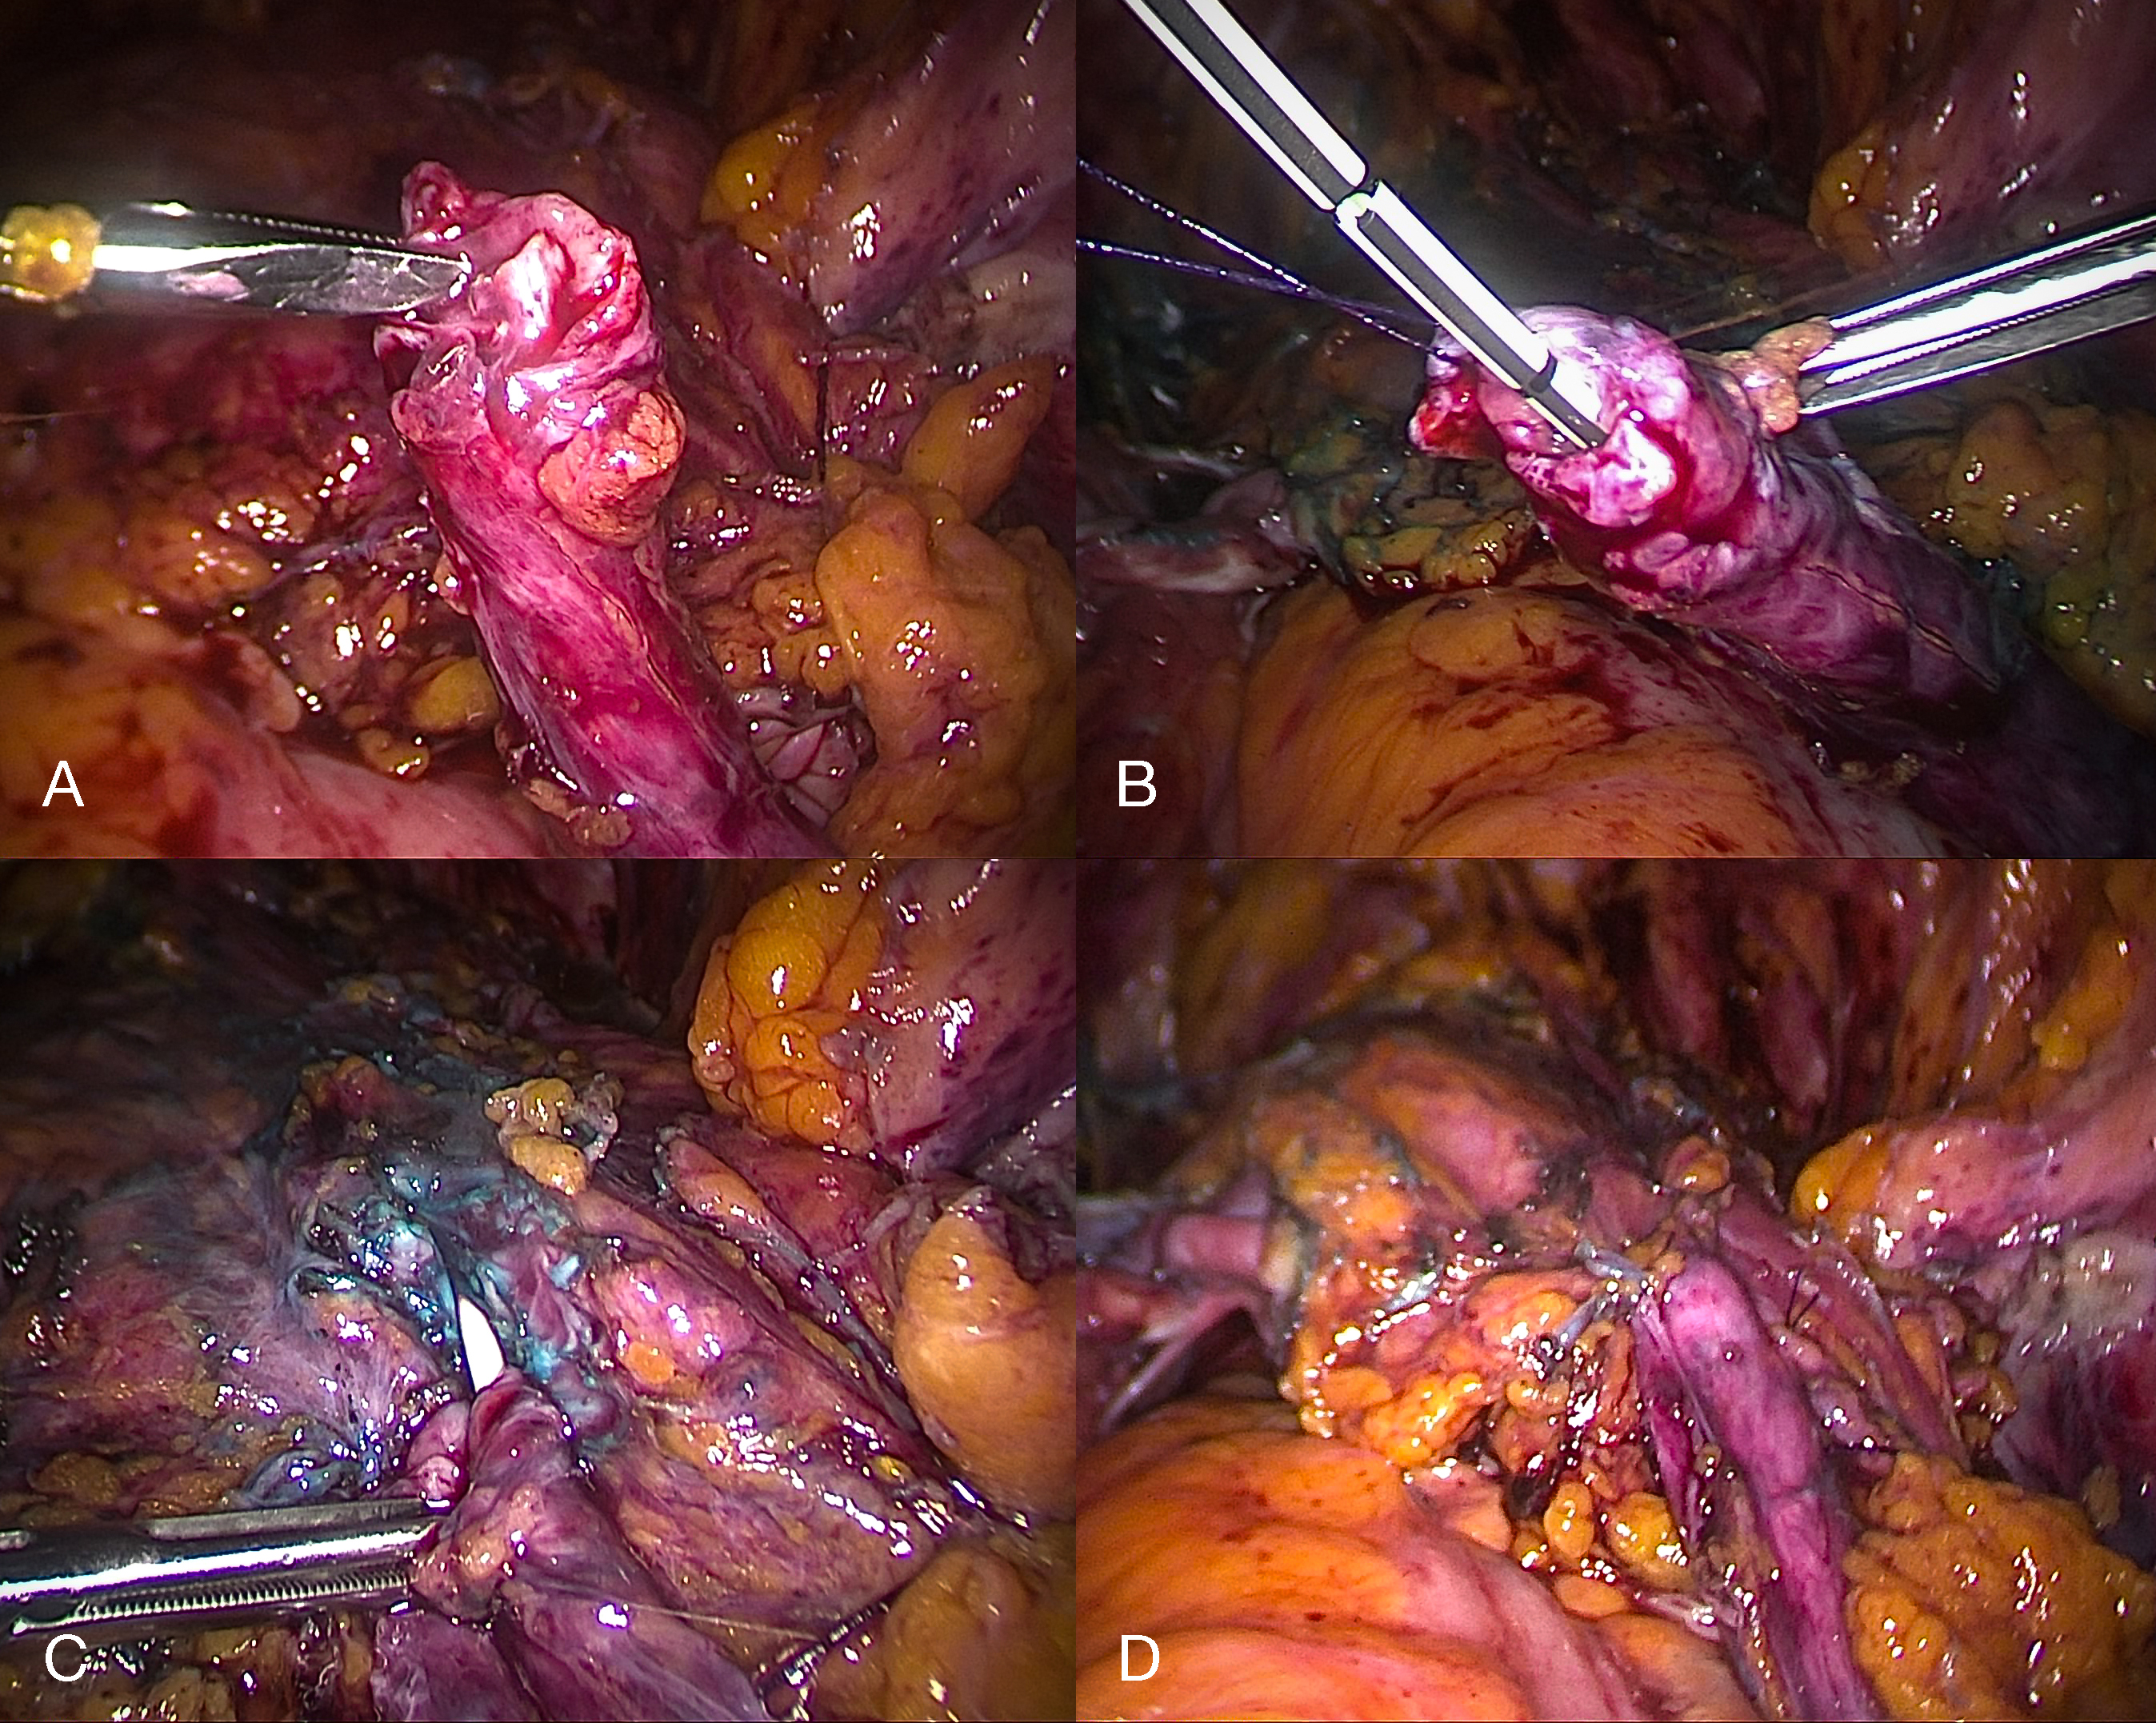


**Supplementary Figure 4:** Laparoscopic depiction of ureteroneocystostomy secondary to ureteral deep endometriosis.
